# Supplementary material
Source: PubMed Central journal article supplement (PMC6676761)
Supplement: JPCRR-6.2-Appendix_1.pdf [file JPCRR-6.2-Appendix_1.pdf]

## Appendix 1. Search Strings

### Embase Search

'hospital-based care' OR 'hospital based care' OR 'hospitals'/exp OR 'hospitals' OR 'hospital-based practice' OR 'acute care'/exp OR 'acute care'

AND

('medical care team' OR 'interdisciplinary care team' OR 'multidisciplinary care team' OR 'interprofessional care team' OR 'patient care team'/exp OR 'patient care team' OR teams OR 'teamwork'/exp OR teamwork OR 'team work'/exp OR 'team work' OR 'shared care' OR 'collaborative care'/exp OR 'collaborative care' OR 'integrated care'/exp OR 'integrated care' OR 'team-based care' OR 'team based care'/exp OR 'team based care' OR interprofessional\* OR 'interprofessional collaboration'/exp OR 'interprofessional collaboration' OR 'interprofessional collaborative practice')

AND

('patient satisfaction'/exp OR 'patient satisfaction' OR hcahps OR hhcahps OR 'hospital consumer assessment of healthcare providers and systems' OR 'press ganey' OR 'patient-reported outcomes' OR 'patient reported outcome measures'/exp OR 'patient reported outcome measures' OR 'patient experience'/exp OR 'patient experience' OR 'patient perception'/exp OR 'patient perception' OR 'patient rating' OR 'patient scoring' OR 'patient grading')

### OvidMD Search

1. Hospital AND "interdisciplinary team" AND "patient satisfaction" with journal article filter: 130 results
2. Hospital AND "interprofessional team" AND "patient satisfaction" with journal article filter: 32 results
3. Hospital AND "multidisciplinary team" AND "patient satisfaction" with journal article filter: 335 results

### Google Scholar Advanced Search

- With all the words: hospital team
- With the exact phrase: patient satisfaction
- With at least one of the words: "interprofessional team" "interdisciplinary team" "multidisciplinary team"
- Dated 2012–2017

### CINAHL Search

('hospital-based care' OR 'hospital based care' OR (MH 'hospitals') OR 'hospital-based practice' OR 'acute care')

AND

('medical care team' OR 'interdisciplinary care team' OR 'interdisciplinary care team' OR 'multidisciplinary care team' OR 'interprofessional care team' OR 'patient care team' OR (MH 'patient care team') OR teams OR teamwork OR 'team work' OR team-work OR 'shared care' OR 'collaborative care' OR 'integrated care' OR 'team-based care' OR 'team based care' OR interprofessional\* OR 'interprofessional collaboration' OR 'interprofessional collaborative practice')

AND

'patient satisfaction' OR (MH 'patient satisfaction') OR 'consumer satisfaction' OR HCAHPS OR HHCAHPS OR 'hospital consumer assessment of healthcare providers and systems' OR 'Press Ganey' OR 'Patient-Reported Outcomes' OR (MH 'Patient Reported Outcome Measures') OR 'patient experience' or 'patient perception' OR 'patient rating' OR 'patient scoring' OR 'patient grading'

### Cochrane Advanced Search (fields set to search all text)

'hospital-based care' OR 'hospital based care' OR [mh 'hospitals'] OR 'hospital-based practice' OR 'acute care'

AND

'medical care team' OR 'interdisciplinary care team' OR 'interdisciplinary care team' OR 'multidisciplinary care team' OR 'interprofessional care team' OR 'patient care team' OR [mh 'patient care team'] OR teams OR teamwork OR 'team work' OR team-work OR 'shared care' OR 'collaborative care' OR 'integrated care' OR 'team-based care' OR 'team based care' OR interprofessional\* OR 'interprofessional collaboration' OR 'interprofessional collaborative practice'

AND

'patient satisfaction' OR [mh 'patient satisfaction'] OR 'consumer satisfaction' OR HCAHPS OR HHCAHPS OR 'hospital consumer assessment of healthcare providers and systems' OR 'Press Ganey' OR 'Patient-Reported Outcomes' OR [mh 'Patient Reported Outcome Measures'] OR 'patient experience' or 'patient perception' OR 'patient rating' OR 'patient scoring' OR 'patient grading'

### PubMed Search

'hospital-based care' OR 'hospital based care' OR 'hospitals' [MeSH] OR 'hospital based practice' OR 'hospital-based practice' OR 'acute care'

AND

'medical care team' OR 'interdisciplinary care team' OR 'interdisciplinary care team' OR 'multidisciplinary care team' OR 'interprofessional care team' OR 'patient care team' OR 'patient care team' [mesh] OR 'team' OR 'teams' OR 'teamwork' OR 'team work' OR 'team-work' OR 'shared care' OR 'collaborative care' OR 'integrated care' OR 'team-based care' OR 'team based care' OR interprofessional\* OR 'interprofessional collaboration' OR 'interprofessional collaborative practice'

AND

'patient satisfaction' OR 'patient satisfaction' [mesh] OR 'consumer satisfaction' OR HCAHPS OR HHCAHPS OR 'hospital consumer assessment of healthcare providers and systems' OR 'Press Ganey' OR 'Patient-Reported Outcomes' OR 'Patient Reported Outcome Measures' [mesh] OR 'hospital value-based purchasing' OR 'patient experience' or 'patient perception' OR 'patient rating' or 'patient scoring' or 'patient grading'
